# Supplementary material for: Women and Men’s Perspectives on the Factors Related to Women’s Dyadic Sexual Desire, and on the Treatment of Hypoactive Sexual Desire Disorder
Source: MDPI journal article supplement (doi:10.3390/jcm10225321), 2021-11-15
Supplement: s1 [file s1]

### **The Study Questionnaire**

This survey investigates the dynamics of women's sexual desire, and is designed for both heterosexual men and women over the age of 18 and who are currently in a relationship that has lasted for at least three months. The survey is anonymous; you cannot be identified from your answers. The results will be used solely for academic research. The survey takes about 10 minutes. By filling in the survey, you have shown your agreement to participate in this project. Thank you for your honest and insightful answers.

#### **Screening questions:**

What is your age? (please write in years) \_\_\_\_\_ (screened for >18)

What is your sexual orientation? Gay/  
Bisexual/Transsexual/Heterosexual (screened for Heterosexual)

Did you have a steady, intimate partner for most of the past year?  
Yes/ No (screened for Yes)

Please rate the influence of the following factors on women's sexual desire. Mark -3, -2, -1 if the factor reduces women's sexual desire and 1, 2, 3 if it increases women's sexual desire. A score of -3 reduces sexual desire very much (-3), quite a bit (-2), somewhat (-1), 0 is neutral, and 1, 2, 3 represent an increase in sexual desire (somewhat, quite a bit, very much), respectively.

|                                                          | -3<br>Reduces<br>sexual<br>desire | -2                    | -1                    | 0<br>Neither<br>increases<br>nor<br>decreases | 1                     | 2                     | 3 Increases<br>sexual<br>desire |
|----------------------------------------------------------|-----------------------------------|-----------------------|-----------------------|-----------------------------------------------|-----------------------|-----------------------|---------------------------------|
| Lack of time<br>with her<br>partner                      | <input type="radio"/>             | <input type="radio"/> | <input type="radio"/> | <input type="radio"/>                         | <input type="radio"/> | <input type="radio"/> | <input type="radio"/>           |
| Thinking that<br>sex is<br>forbidden or<br>dirty         | <input type="radio"/>             | <input type="radio"/> | <input type="radio"/> | <input type="radio"/>                         | <input type="radio"/> | <input type="radio"/> | <input type="radio"/>           |
| Feeling love for<br>her partner                          | <input type="radio"/>             | <input type="radio"/> | <input type="radio"/> | <input type="radio"/>                         | <input type="radio"/> | <input type="radio"/> | <input type="radio"/>           |
| Arguments<br>with her<br>partner                         | <input type="radio"/>             | <input type="radio"/> | <input type="radio"/> | <input type="radio"/>                         | <input type="radio"/> | <input type="radio"/> | <input type="radio"/>           |
| Getting<br>attention from<br>her partner                 | <input type="radio"/>             | <input type="radio"/> | <input type="radio"/> | <input type="radio"/>                         | <input type="radio"/> | <input type="radio"/> | <input type="radio"/>           |
| Drinking<br>alcohol                                      | <input type="radio"/>             | <input type="radio"/> | <input type="radio"/> | <input type="radio"/>                         | <input type="radio"/> | <input type="radio"/> | <input type="radio"/>           |
| The possibility<br>that a<br>pregnancy may<br>result     | <input type="radio"/>             | <input type="radio"/> | <input type="radio"/> | <input type="radio"/>                         | <input type="radio"/> | <input type="radio"/> | <input type="radio"/>           |
| Cold weather                                             | <input type="radio"/>             | <input type="radio"/> | <input type="radio"/> | <input type="radio"/>                         | <input type="radio"/> | <input type="radio"/> | <input type="radio"/>           |
| When the<br>woman thinks<br>her partner is<br>attractive | <input type="radio"/>             | <input type="radio"/> | <input type="radio"/> | <input type="radio"/>                         | <input type="radio"/> | <input type="radio"/> | <input type="radio"/>           |
| When the<br>woman feels<br>attractive                    | <input type="radio"/>             | <input type="radio"/> | <input type="radio"/> | <input type="radio"/>                         | <input type="radio"/> | <input type="radio"/> | <input type="radio"/>           |
| Every day<br>stress                                      | <input type="radio"/>             | <input type="radio"/> | <input type="radio"/> | <input type="radio"/>                         | <input type="radio"/> | <input type="radio"/> | <input type="radio"/>           |
| Fatigue                                                  | <input type="radio"/>             | <input type="radio"/> | <input type="radio"/> | <input type="radio"/>                         | <input type="radio"/> | <input type="radio"/> | <input type="radio"/>           |
| Daily hassles                                            | <input type="radio"/>             | <input type="radio"/> | <input type="radio"/> | <input type="radio"/>                         | <input type="radio"/> | <input type="radio"/> | <input type="radio"/>           |
| Childcare                                                | <input type="radio"/>             | <input type="radio"/> | <input type="radio"/> | <input type="radio"/>                         | <input type="radio"/> | <input type="radio"/> | <input type="radio"/>           |

|                                                                 |                       |                       |                       |                       |                       |                       |                       |
|-----------------------------------------------------------------|-----------------------|-----------------------|-----------------------|-----------------------|-----------------------|-----------------------|-----------------------|
| Good mood                                                       | <input type="radio"/> |
| Memories from past intimate relationships                       | <input type="radio"/> |
| Worries over her body image                                     | <input type="radio"/> |
| When her partner is mainly focused on meeting his own needs     | <input type="radio"/> |
| Creative and active imagination                                 | <input type="radio"/> |
| Worries over the security situation                             | <input type="radio"/> |
| Foreplay                                                        | <input type="radio"/> |
| Meaningful discussions with her partner                         | <input type="radio"/> |
| Oral contraceptives                                             | <input type="radio"/> |
| The days just before her menstrual cycle                        | <input type="radio"/> |
| When the woman knows she will not reach orgasm with her partner | <input type="radio"/> |
| Medical problems of one of the partners                         | <input type="radio"/> |
| Watching pornography together                                   | <input type="radio"/> |

|                                     |                       |                       |                       |                       |                       |                       |                       |
|-------------------------------------|-----------------------|-----------------------|-----------------------|-----------------------|-----------------------|-----------------------|-----------------------|
| Doing household chores together     | <input type="radio"/> |
| Open communication with her partner | <input type="radio"/> |

How often do you think women want to engage in sexual activity?  
 (1) Not at all (2) Once a month (3) Once in two weeks (4) Once a week (5) Twice a week (6) Several times a week (7) A lot (several times a day).

Suppose a woman has no interest in sex for several months. Rate how appropriate it would be to seek help from each of the eight sources (where (1) Not at all appropriate to (7) Very appropriate).

|                            | 1 Not at all appropriate | 2                     | 3                     | 4                     | 5                     | 6                     | 7 Very appropriate    |
|----------------------------|--------------------------|-----------------------|-----------------------|-----------------------|-----------------------|-----------------------|-----------------------|
| Sex therapist              | <input type="radio"/>    | <input type="radio"/> | <input type="radio"/> | <input type="radio"/> | <input type="radio"/> | <input type="radio"/> | <input type="radio"/> |
| Family or couple therapist | <input type="radio"/>    | <input type="radio"/> | <input type="radio"/> | <input type="radio"/> | <input type="radio"/> | <input type="radio"/> | <input type="radio"/> |
| Internet                   | <input type="radio"/>    | <input type="radio"/> | <input type="radio"/> | <input type="radio"/> | <input type="radio"/> | <input type="radio"/> | <input type="radio"/> |
| Psychologist               | <input type="radio"/>    | <input type="radio"/> | <input type="radio"/> | <input type="radio"/> | <input type="radio"/> | <input type="radio"/> | <input type="radio"/> |
| Gynecologist               | <input type="radio"/>    | <input type="radio"/> | <input type="radio"/> | <input type="radio"/> | <input type="radio"/> | <input type="radio"/> | <input type="radio"/> |
| Family or friends          | <input type="radio"/>    | <input type="radio"/> | <input type="radio"/> | <input type="radio"/> | <input type="radio"/> | <input type="radio"/> | <input type="radio"/> |
| Family doctor              | <input type="radio"/>    | <input type="radio"/> | <input type="radio"/> | <input type="radio"/> | <input type="radio"/> | <input type="radio"/> | <input type="radio"/> |
| Religious figure           | <input type="radio"/>    | <input type="radio"/> | <input type="radio"/> | <input type="radio"/> | <input type="radio"/> | <input type="radio"/> | <input type="radio"/> |

Are you:

- ☐ Married or living with a partner
- ☐ Single
- ☐ Other \_\_\_\_\_

Do you have children?

- ☐ Yes
- ☐ No

How many children do you have?

---

What is your level of religiosity ?

- ☐ Religious
- ☐ Traditional
- ☐ Secular

How do you rate your health?

- ☐ 1 Very poor
- ☐ 2
- ☐ 3
- ☐ 4
- ☐ 5
- ☐ 6
- ☐ 7 Very good

How many years of education have you completed?

---

---

Please state your agreement to the following: My family's income covers my basic needs

- ☐ 1 Do not agree
- ☐ 2 Somewhat disagree
- ☐ 3 Do not agree or disagree
- ☐ 4 Somewhat agree
- ☐ 5 Completely agree
